# Supplementary material for: Breastfeeding at Any Cost? Adverse Effects of Breastfeeding Pain on Mother–Infant Behavior
Source: MDPI journal article supplement (doi:10.3390/biology12050636), 2023-04-22
Supplement: s1 [file s1]

**Table S1. The average inter-rater reliability between coders, using Krippendorff's alpha test**

|                      | Mathers          | Infants          |
|----------------------|------------------|------------------|
| Valence              | $\alpha = 0.830$ | $\alpha = 0.846$ |
| Expression intensity | $\alpha = 0.847$ | $\alpha = 0.820$ |
| Gaze                 | $\alpha = 0.829$ | $\alpha = 0.898$ |

**Analysis S1. Confirming the consistency of each measurement across the interaction**

We tested the distribution of each behavioral measurement in two random bins of 60 seconds. Kolmogorov-Smirnov test confirmed the similarity of the two distributions of each measurement for each dyad, supporting the reliability of these measures.

Infant average arousal score: K-S= 0.551,  $p=0.922$

Infant valence K-S= 0.521,  $p=0.949$

Parent average arousal score K-S= 1.183,  $p=0.122$

Parent valence K-S= 0.417,  $p=0.995$

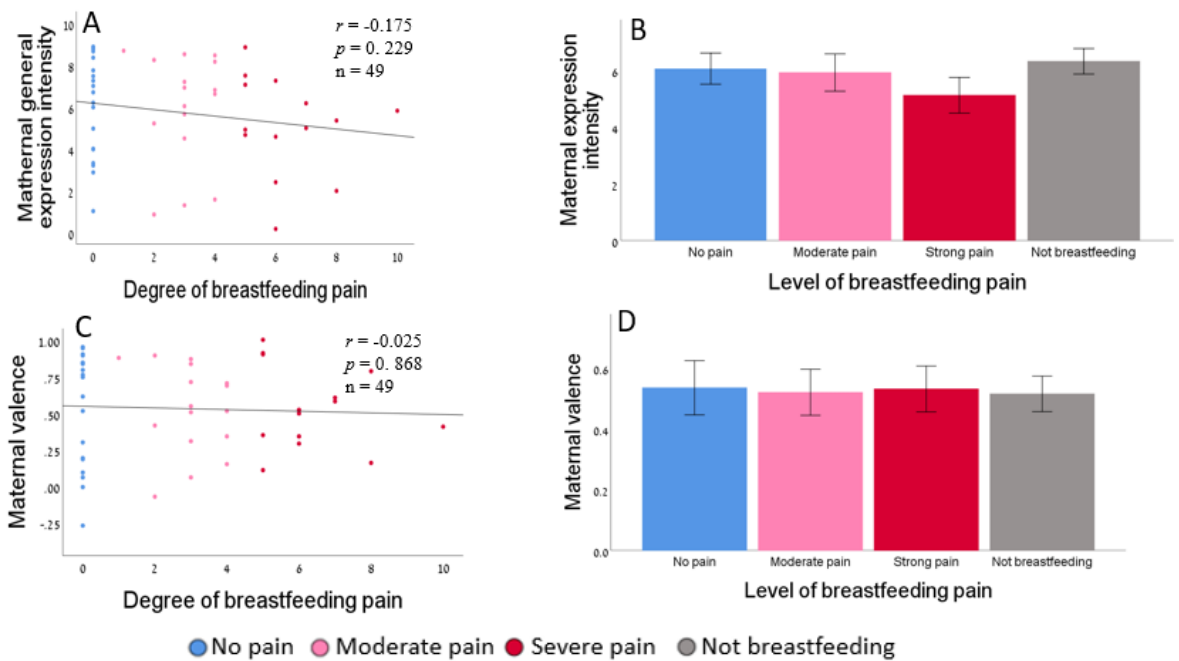

**Figure S1. The association between maternal breastfeeding pain and maternal expression intensity and valence.** (A) Partial Pearson correlation between the degree of breastfeeding pain and maternal expression intensity while controlling for infants' age. (B) Maternal expression intensity in the four pain groups, one-way ANCOVA,  $F(3,65) = 0.291$ ,  $p = 0.832$ . (C) Partial Pearson's correlation between the degree of breastfeeding pain and maternal valence while controlling for infants' age. (D) Maternal valence in the four pain groups, one-way ANCOVA,  $F(3,65) = 0.844$ ,  $p = 0.475$ .
